# Supplementary material
Source: MDPI journal article supplement (https://www.mdpi.com/2072-6694/14/20/5138)
Supplement: s1 [file s1]

Archive with 2 entries (2 files):
- cancers-1891263 STROBE Checklist.pdf
- cancers-1891263-supplementary tables and figure NEW.pdf
