# Supplementary material for: Association of Non-Steroidal Anti-Inflammatory Drugs, Genetic Risk, and Environmental Risk Factors with Incidence of Colorectal Cancer
Source: MDPI journal article supplement (doi:10.3390/cancers14205138), 2022-10-20
Supplement: s1 [file s1 › cancers-1891263-supplementary tables and figure NEW.pdf]

# Supplementary Material: Association of Non-Steroidal Anti-Inflammatory Drugs, Genetic Risk, and Environmental Risk Factors with Incidence of Colorectal Cancer

Jiaojiao Ren, Peidong Zhang, Zhihao Li, Xiru Zhang, Wenfang Zhong, Weiqi Song, Xing Wang, Pingming Gao \* and Chen Mao \*

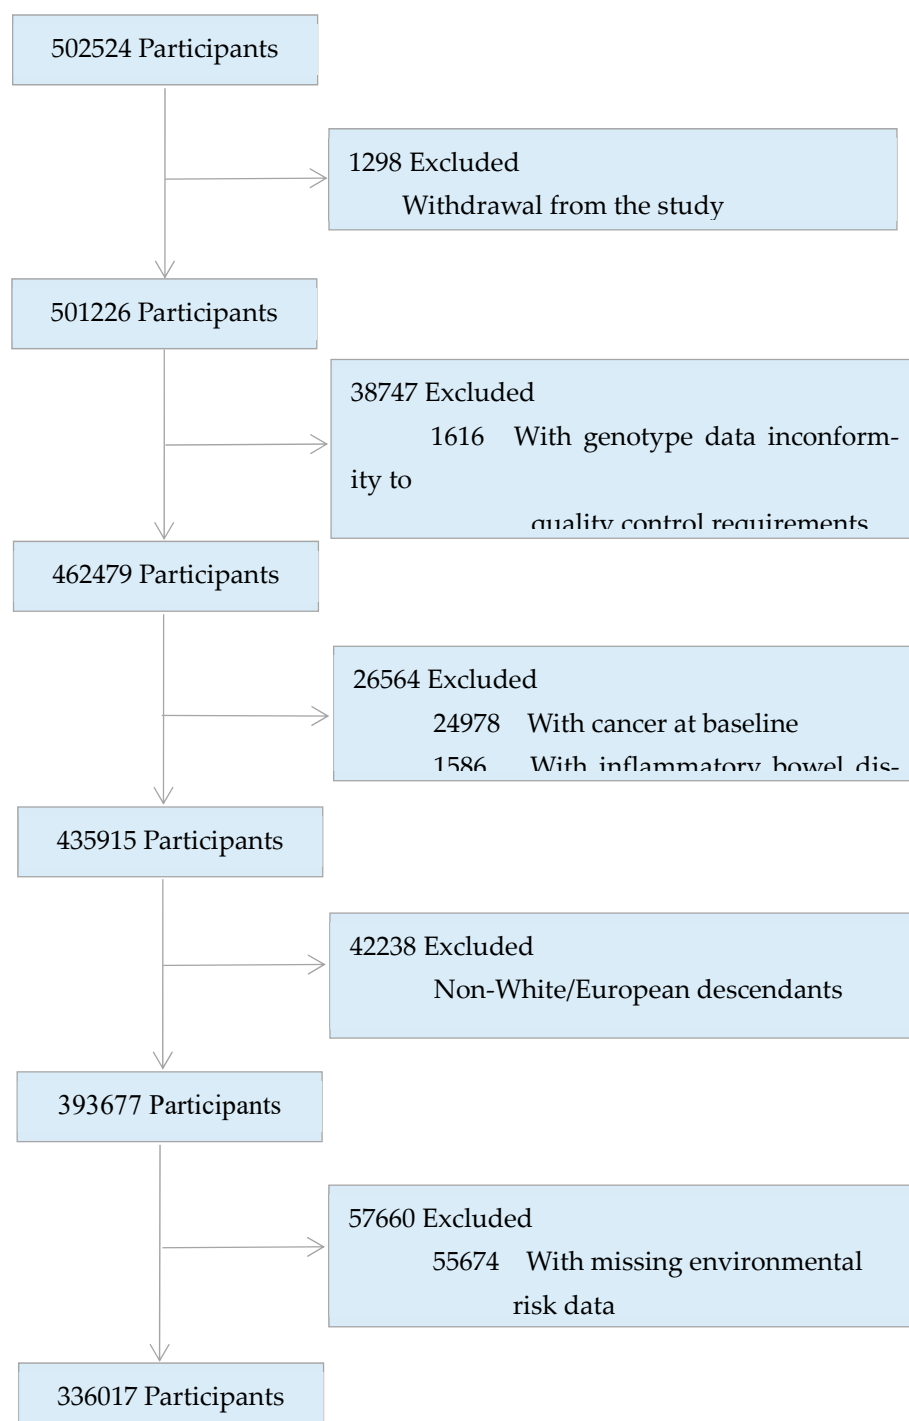

**Figure S1.** Flow diagram of the study population selection.

**Table S1.** List of single-nucleotide polymorphisms constructing the polygenic risk score for CRC.

| SNP         | Chromosome | Position  | Non-risk allele | Risk allele | Risk allele frequency | $\beta$ |
|-------------|------------|-----------|-----------------|-------------|-----------------------|---------|
| rs4360494   | 1          | 38455891  | C               | G           | 0.4539                | 0.0379  |
| rs12144319  | 1          | 55246035  | T               | C           | 0.2548                | 0.0661  |
| rs72647484  | 1          | 22587728  | C               | T           | 0.9107                | 0.0504  |
| rs7542665   | 1          | 62673037  | T               | C           | 0.273                 | 0.0334  |
| rs6678517   | 1          | 183002639 | G               | A           | 0.5898                | 0.073   |
| rs17011141  | 1          | 222112634 | A               | G           | 0.2087                | 0.0877  |
| rs448513    | 2          | 159964552 | T               | C           | 0.326                 | 0.0054  |
| rs11884596  | 2          | 199612407 | T               | C           | 0.3823                | 0.0342  |
| rs983402    | 2          | 199781586 | C               | T           | 0.3312                | 0.0622  |
| rs7606562   | 2          | 48686695  | A               | T           | 0.813                 | 0.0414  |
| rs11692435  | 2          | 98275354  | A               | G           | 0.9                   | 0.0492  |
| rs3731861   | 2          | 219191256 | C               | T           | 0.6295                | 0.0613  |
| rs10049390  | 3          | 133701119 | G               | A           | 0.7353                | 0.0455  |
| rs13086367  | 3          | 112903888 | G               | A           | 0.5262                | 0.0463  |
| rs72942485  | 3          | 112999560 | A               | G           | 0.9802                | 0.0545  |
| rs9831861   | 3          | 53088285  | T               | G           | 0.59                  | 0.0294  |
| rs35470271  | 3          | 40915239  | A               | G           | 0.154                 | 0.0994  |
| rs12635946  | 3          | 112916918 | T               | C           | 0.62                  | 0.0334  |
| rs113569514 | 3          | 133748789 | C               | T           | 0.62                  | 0.0414  |
| rs9876206   | 3          | 169517436 | T               | C           | 0.7507                | 0.0453  |
| rs6781752   | 3          | 66365163  | G               | A           | 0.205                 | 0.0597  |
| rs11727676  | 4          | 145659064 | T               | C           | 0.098                 | 0.0093  |
| rs1391441   | 4          | 106128760 | G               | A           | 0.672                 | 0.0148  |
| rs13149359  | 4          | 94938618  | C               | A           | 0.3663                | 0.052   |
| rs7708610   | 5          | 40102443  | G               | A           | 0.3564                | 0.0384  |
| rs78368589  | 5          | 1240204   | C               | T           | 0.0597                | 0.0786  |
| rs145364999 | 5          | 98206082  | A               | T           | 0.9969                | 0.3496  |
| rs2735940   | 5          | 1296486   | A               | G           | 0.4952                | 0.0865  |
| rs12514517  | 5          | 40280076  | G               | A           | 0.288                 | 0.1013  |
| rs755229494 | 5          | 112097351 | A               | G           | 0.0011                | 0.6286  |
| rs12659017  | 5          | 125988175 | A               | G           | 0.232                 | 0.0374  |
| rs4976270   | 5          | 134467220 | T               | C           | 0.5501                | 0.0693  |
| rs13204733  | 6          | 55566108  | A               | G           | 0.141                 | 0.0643  |
| rs116685461 | 6          | 31315512  | A               | G           | 0.8755                | 0.0655  |
| rs9271695   | 6          | 32593080  | A               | G           | 0.7954                | 0.0889  |
| rs2516420   | 6          | 31449620  | T               | C           | 0.9263                | 0.1091  |
| rs116353863 | 6          | 31010185  | T               | C           | 0.0165                | 0.1202  |
| rs16878812  | 6          | 35569562  | G               | A           | 0.8861                | 0.0778  |
| rs9470361   | 6          | 36623379  | G               | A           | 0.2488                | 0.054   |
| rs62404966  | 6          | 55712124  | T               | C           | 0.7623                | 0.0724  |
| rs3131043   | 6          | 30758466  | A               | G           | 0.43                  | 0.0294  |
| rs2070699   | 6          | 12292772  | G               | T           | 0.48                  | 0.0294  |
| rs1476570   | 6          | 29809860  | G               | A           | 0.376                 | 0.0492  |
| rs3830041   | 6          | 32191339  | C               | T           | 0.14                  | 0.0645  |
| rs6928864   | 6          | 105966894 | A               | C           | 0.91                  | 0.0531  |
| rs62396735  | 6          | 41702582  | T               | C           | 0.2908                | 0.033   |
| rs12672022  | 7          | 45136423  | C               | T           | 0.8345                | 0.0067  |
| rs80077929  | 7          | 46094089  | C               | T           | 0.1107                | 0.0093  |
| rs10951878  | 7          | 46926695  | T               | C           | 0.91                  | 0.0531  |
| rs3801081   | 7          | 47511161  | A               | G           | 0.49                  | 0.0253  |
| rs7013278   | 8          | 128414892 | C               | T           | 0.3761                | 0.0091  |
| rs4313119   | 8          | 128571855 | T               | G           | 0.7486                | 0.0518  |
| rs16892766  | 8          | 117630683 | A               | C           | 0.0829                | 0.2099  |
| rs6469654   | 8          | 117632965 | C               | G           | 0.2288                | 0.0677  |
| rs117079142 | 8          | 117790914 | C               | A           | 0.0432                | 0.1139  |
| rs6983267   | 8          | 128413305 | T               | G           | 0.5228                | 0.1052  |
| rs34405347  | 9          | 101679752 | G               | T           | 0.9034                | 0.0089  |
| rs1537372   | 9          | 22103183  | T               | G           | 0.5692                | 0.012   |
| rs10980628  | 9          | 113671403 | T               | C           | 0.2106                | 0.0511  |
| rs12217641  | 10         | 8663875   | T               | C           | 0.6981                | 0.0069  |
| rs10786560  | 10         | 101315166 | A               | G           | 0.762                 | 0.0082  |
| rs1250567   | 10         | 81046265  | T               | C           | 0.4405                | 0.047   |
| rs11255841  | 10         | 8739580   | A               | T           | 0.703                 | 0.1064  |
| rs10821907  | 10         | 52648454  | T               | C           | 0.8276                | 0.073   |
| rs704017    | 10         | 80819132  | A               | G           | 0.5846                | 0.0765  |

|             |    |           |   |   |        |        |
|-------------|----|-----------|---|---|--------|--------|
| rs11190164  | 10 | 101351704 | A | G | 0.2626 | 0.0889 |
| rs12246635  | 10 | 114288619 | T | C | 0.0983 | 0.0975 |
| rs11196170  | 10 | 114722621 | G | A | 0.2178 | 0.0527 |
| rs7946853   | 11 | 74409077  | T | C | 0.8624 | 0.0119 |
| rs55864876  | 11 | 100717136 | A | G | 0.9184 | 0.015  |
| rs2186607   | 11 | 101656397 | A | T | 0.5178 | 0.0483 |
| rs61389091  | 11 | 74427921  | T | C | 0.9606 | 0.1934 |
| rs4450168   | 11 | 10286755  | A | C | 0.17   | 0.0413 |
| rs174533    | 11 | 61549025  | A | G | 0.6739 | 0.0636 |
| rs7121958   | 11 | 74280012  | T | G | 0.5105 | 0.078  |
| rs3087967   | 11 | 111156836 | C | T | 0.2911 | 0.1122 |
| rs4759277   | 12 | 57533690  | C | A | 0.3546 | 0.0285 |
| rs1427760   | 12 | 115100714 | T | C | 0.5268 | 0.0424 |
| rs3217874   | 12 | 4400808   | C | T | 0.4282 | 0.0453 |
| rs10849433  | 12 | 6406904   | T | C | 0.267  | 0.0468 |
| rs11610543  | 12 | 43134191  | A | G | 0.5013 | 0.0474 |
| rs35808169  | 12 | 4368607   | T | C | 0.1721 | 0.089  |
| rs3217810   | 12 | 4388271   | C | T | 0.1253 | 0.1181 |
| rs2250430   | 12 | 6421174   | A | T | 0.7095 | 0.0597 |
| rs77969132  | 12 | 31594813  | C | T | 0.015  | 0.1583 |
| rs12372718  | 12 | 51171090  | A | G | 0.3924 | 0.0896 |
| rs597808    | 12 | 111973358 | A | G | 0.5166 | 0.0737 |
| rs7300312   | 12 | 115890922 | T | C | 0.5719 | 0.066  |
| rs2710310   | 12 | 12035649  | T | C | 0.7596 | 0.0145 |
| rs78341008  | 13 | 73791554  | T | C | 0.0719 | 0.0109 |
| rs8000189   | 13 | 111075881 | C | T | 0.6401 | 0.0473 |
| rs45597035  | 13 | 73649152  | G | A | 0.6506 | 0.0495 |
| rs1924816   | 13 | 73997961  | G | A | 0.7737 | 0.0506 |
| rs7333607   | 13 | 37462010  | A | G | 0.235  | 0.0758 |
| rs1330889   | 13 | 78609615  | T | C | 0.87   | 0.0453 |
| rs1951864   | 14 | 54369299  | G | A | 0.3722 | 0.0059 |
| rs17094983  | 14 | 59189361  | A | G | 0.8773 | 0.0062 |
| rs8020436   | 14 | 59208437  | G | A | 0.4016 | 0.0294 |
| rs35107139  | 14 | 54419106  | A | C | 0.4235 | 0.0912 |
| rs4901473   | 14 | 54445157  | A | G | 0.378  | 0.0465 |
| rs745213    | 15 | 68060389  | T | G | 0.8102 | 0.0072 |
| rs12594720  | 15 | 67007018  | G | C | 0.7218 | 0.0246 |
| rs56324967  | 15 | 67402824  | T | C | 0.6757 | 0.0689 |
| rs17816465  | 15 | 33156386  | G | A | 0.2055 | 0.069  |
| rs12708491  | 15 | 32992836  | A | G | 0.5872 | 0.0464 |
| rs2293581   | 15 | 33010736  | G | A | 0.2116 | 0.1248 |
| rs7495132   | 15 | 91172901  | C | T | 0.12   | 0.0453 |
| rs9930005   | 16 | 80043258  | A | C | 0.4303 | 0.0061 |
| rs12447408  | 16 | 86252544  | G | A | 0.2535 | 0.0079 |
| rs9924886   | 16 | 68743939  | C | A | 0.7321 | 0.055  |
| rs12149163  | 16 | 86339315  | C | T | 0.4976 | 0.0487 |
| rs62042090  | 16 | 86703949  | C | T | 0.2164 | 0.0481 |
| rs983318    | 17 | 70413253  | G | A | 0.2526 | 0.0397 |
| rs73975586  | 17 | 814243    | T | A | 0.8732 | 0.0497 |
| rs1078643   | 17 | 10707241  | G | A | 0.7636 | 0.0747 |
| rs75954926  | 17 | 81061048  | A | G | 0.6568 | 0.0882 |
| rs373585858 | 17 | 80394556  | G | A | 0.0016 | 0.1103 |
| rs4968127   | 17 | 809643    | A | G | 0.3684 | 0.0514 |
| rs11874392  | 18 | 46453156  | T | A | 0.545  | 0.1606 |
| rs73068325  | 19 | 59079096  | C | T | 0.1826 | 0.0066 |
| rs34797592  | 19 | 16417198  | C | T | 0.1182 | 0.0824 |
| rs28840750  | 19 | 33519927  | G | T | 0.948  | 0.1939 |
| rs1963413   | 19 | 41871573  | G | A | 0.6119 | 0.0441 |
| rs12979278  | 19 | 49218602  | C | T | 0.53   | 0.0293 |
| rs2738783   | 20 | 62308612  | G | T | 0.2029 | 0.006  |
| rs6067417   | 20 | 48983697  | T | C | 0.5635 | 0.0331 |
| rs6031311   | 20 | 42666475  | C | T | 0.7591 | 0.0362 |
| rs6091189   | 20 | 49256285  | C | T | 0.1529 | 0.0549 |
| rs994308    | 20 | 6603622   | T | C | 0.5939 | 0.0626 |
| rs28488     | 20 | 6762221   | C | T | 0.6388 | 0.0714 |
| rs556532366 | 20 | 8568071   | C | T | 0.0029 | 0.0715 |
| rs189583    | 20 | 6376457   | C | G | 0.3298 | 0.0795 |
| rs4813802   | 20 | 6699595   | T | G | 0.3561 | 0.0819 |
| rs11087784  | 20 | 7740976   | A | G | 0.1523 | 0.0874 |

|           |    |          |   |   |        |        |
|-----------|----|----------|---|---|--------|--------|
| rs6066825 | 20 | 47340117 | G | A | 0.6448 | 0.0719 |
| rs6063514 | 20 | 49055318 | T | C | 0.6086 | 0.0547 |
| rs13831   | 20 | 57475191 | A | G | 0.684  | 0.0334 |
| rs1741640 | 20 | 60932414 | T | C | 0.7652 | 0.1146 |
| rs6058093 | 20 | 33213196 | A | C | 0.4942 | 0.045  |

**Table S2.** Definitions of environmental risk factors in the UK Biobank<sup>a</sup>.

| Factors               | Definitions                                                                                                                                                                                                                                                                                                                                                                                                                                           | Field ID of UK biobank                                                                                           |
|-----------------------|-------------------------------------------------------------------------------------------------------------------------------------------------------------------------------------------------------------------------------------------------------------------------------------------------------------------------------------------------------------------------------------------------------------------------------------------------------|------------------------------------------------------------------------------------------------------------------|
| Education             | Education was categorized into two groups: the high qualifications included ‘College or university degree’, ‘NVQ or HND or HNC or equivalent’, ‘Other professional qualifications’, and ‘A levels/AS levels or equivalent’; the others defined as low qualifications. <sup>1</sup>                                                                                                                                                                    | 6138                                                                                                             |
| DASH score (diet)     | According to the DASH recommendation: with regard to intake of fruits, vegetables, whole grains, and low-fat dairy products, participants with the 1 quintile (lowest) get 1 score and those with the 5 quintile (highest) get 5 score; on the contrary, consumption of red or processed meats, sugar-sweetened beverages, and sodium, participants with the 1 quintile (lowest) get 5 score and the 5 quintile (highest) get 1 score. <sup>2,3</sup> | 1309, 1319, 1289, 1299, 1438, 1448, 1458, 1468, 1408, 1418, 1349, 3680, 1359, 1369, 1379, 1389, 3680, 6144, 1478 |
| Smoking               | Smoking combined smoking status with smoking pack-years, and defined as two groups: current or former ( $\geq 30$ pack years) and never or former ( $< 30$ pack years). <sup>4,5</sup>                                                                                                                                                                                                                                                                | 20116, 2867, 2887, 2897, 2907, 3436, 3486, 6183, 6194, 20161                                                     |
| Alcohol consumption   | Based on Dietary Guidelines for Americans: 1 drink equivalent is equivalent to 14g of pure alcohol. <sup>6</sup>                                                                                                                                                                                                                                                                                                                                      | 20117, 1558, 1568, 1578, 1588, 1598, 1608, 5364, 4407, 4418, 4429, 4440, 4451, 4462                              |
| Physical activity     | Based on Global Recommendations on Physical Activity for Health: Regular physical activity was described as greater than or equal to moderate activity for 150 minutes, or vigorous activity for 75 minutes every week, or the combination of moderate and vigorous for 150 minutes. <sup>7</sup>                                                                                                                                                     | 884, 894, 904, 914                                                                                               |
| Occupational exposure | Frequency of exposure to materials that included asbestos, paints, thinners, glues, pesticides, or other fumes at work.                                                                                                                                                                                                                                                                                                                               | 22610, 22612, 22613, 22614                                                                                       |
| BMI                   | Weight in kilograms divided by height in meters squared                                                                                                                                                                                                                                                                                                                                                                                               | 21001                                                                                                            |

<sup>a</sup> BMI, body mass index; DASH, Dietary Approaches to Stop Hypertension.**Table S3.** Descriptions of environmental risk factors used to derive unweighted environmental risk score<sup>a</sup>.

| Environmental risk factors | Points | Descriptions                                                                                         |
|----------------------------|--------|------------------------------------------------------------------------------------------------------|
| Education                  | 0      | Low qualification                                                                                    |
|                            | 1      | High qualification                                                                                   |
| DASH score (diet)          | 0      | Unhealthy diet quality: DASH score $< 24^b$                                                          |
|                            | 1      | Healthy diet quality: DASH score $\geq 24$                                                           |
| Smoking                    | 0      | Current or former ( $\geq 30$ pack years)                                                            |
|                            | 1      | Never or former ( $< 30$ pack years)                                                                 |
| Alcohol consumption        | 0      | $> 24$ g/day for men, $> 12$ g/day for women <sup>c</sup>                                            |
|                            | 1      | $\leq 24$ g/day for men, $\leq 12$ g/day for women                                                   |
| Physical activity          | 0      | Irregular physical activity                                                                          |
|                            | 1      | Regular physical activity                                                                            |
| Occupational exposure      | 0      | Expose to materials containing asbestos, paints, thinners, glues, pesticides, or other fumes at work |
|                            | 1      | Expose none                                                                                          |
| History of type 2 diabetes | 0      | Yes                                                                                                  |
|                            | 1      | No                                                                                                   |
| BMI                        | 0      | $\geq 25$ kg/m <sup>2</sup> (overweight or obese) <sup>d</sup>                                       |
|                            | 1      | $18.5 < \text{BMI} < 25$ kg/m <sup>2</sup> (healthy weight)                                          |

<sup>a</sup> CRC, colorectal cancer; BMI, body mass index; DASH, Dietary Approaches to Stop Hypertension.<sup>b</sup> DASH score in the highest 40%;.<sup>c</sup> Recommendation on alcohol consumption based on World Cancer Research Fund/American Institute for Cancer Research (WCRF/AICR);.<sup>d</sup> Recommendation on obesity based on the World Health Organization.**Table S4.** Definitions of diseases in the UK Biobank<sup>a</sup>.

| Diseases | ICD-9             | ICD-10        | Self-reported fields     |
|----------|-------------------|---------------|--------------------------|
| CRC      | 153, 154.0, 154.1 | C18, C19, C20 | 20001 (1020, 1022, 1023) |

|                    |     |     |                                                  |
|--------------------|-----|-----|--------------------------------------------------|
| Type 2 diabetes    | 250 | E11 | 2443 (1), 2976, 6153 (3), 6177 (3), 20002 (1223) |
| Crohn's disease    | 555 | K50 | 131627, 20002 (1462)                             |
| Ulcerative colitis | 556 | K51 | 131629, 20002 (1463)                             |

<sup>a</sup> ICD, International Classification of Diseases; CRC, colorectal cancer.

**Table S5.** The hazard ratios of CRC incidence risk associated with each environmental risk factor and the environmental risk score<sup>a</sup>.

|                                                        | HR (95% CI) <sup>b</sup> | P value |
|--------------------------------------------------------|--------------------------|---------|
| Environmental risk factors                             |                          |         |
| Low education level                                    | 1.14 (1.06-1.23)         | 0.001   |
| Overweight or obese (BMI $\geq 25$ kg/m <sup>2</sup> ) | 1.16 (1.07-1.26)         | < 0.001 |
| Current or former ( $\geq 30$ pack years) smokers      | 1.40 (1.27-1.54)         | 0.002   |
| Excessive alcohol consumption                          | 1.31 (1.19-1.44)         | < 0.001 |
| Unhealthy diet (DASH score)                            | 1.13 (1.05-1.22)         | 0.001   |
| Irregular physical activity                            | 1.08 (1.00-1.16)         | 0.048   |
| Occupational exposure                                  | 1.16 (1.06-1.27)         | 0.001   |
| History of type 2 diabetes                             | 1.45 (1.27-1.67)         | < 0.001 |
| Environmental risk score                               | 1.29 (1.23-1.36)         | < 0.001 |

<sup>a</sup> CRC, colorectal cancer; BMI, body mass index; DASH, Dietary Approaches to Stop Hypertension; CI, confidence interval.

<sup>b</sup> Adjusted for age, sex, household income, Townsend deprivation index, family history of CRC, screening history of CRC, non-steroidal anti-inflammatory drugs, relatedness, genotyping chip, first 20 principal components of ancestry, and the remaining environmental risk factors.

**Table S6.** The CRC incidence risk in accordance with environmental risk category within each genetic risk category<sup>a</sup>.

| Genetic risk              | Environmental risk              | No. of participants | No. of CRC cases (%) / Person-years | HR (95% CI) <sup>b</sup> | P value | P value for trend | P value for interaction <sup>c</sup> |
|---------------------------|---------------------------------|---------------------|-------------------------------------|--------------------------|---------|-------------------|--------------------------------------|
| Low genetic risk          | Low environmental risk          | 25507               | 102 (0.40)/227013                   | 1 [reference]            |         |                   |                                      |
| Low genetic risk          | Intermediate environmental risk | 28490               | 118 (0.41)/253392                   | 0.94 (0.72-1.22)         | 0.634   | 0.710             |                                      |
| Low genetic risk          | High environmental risk         | 13209               | 73 (0.55)/113188                    | 1.08 (0.79-1.46)         | 0.639   |                   |                                      |
| Intermediate genetic risk | Low environmental risk          | 76336               | 493 (0.65)/679657                   | 1 [reference]            |         |                   |                                      |
| Intermediate genetic risk | Intermediate environmental risk | 85018               | 746 (0.88)/757585                   | 1.22 (1.09-1.37)         | 0.001   | < 0.001           | 0.131                                |
| Intermediate genetic risk | High environmental risk         | 40254               | 429 (1.07)/344747                   | 1.34 (1.18-1.53)         | < 0.001 |                   |                                      |
| High genetic risk         | Low environmental risk          | 25392               | 278 (1.09)/219251                   | 1 [reference]            |         |                   |                                      |
| High genetic risk         | Intermediate environmental risk | 28515               | 437 (1.53)/242750                   | 1.28 (1.10-1.48)         | 0.002   | < 0.001           |                                      |
| High genetic risk         | High environmental risk         | 13296               | 266 (2.00)/110122                   | 1.54 (1.30-1.83)         | < 0.001 |                   |                                      |

<sup>a</sup> CRC, colorectal cancer; HR, hazard ratio; CI, confidence interval.

<sup>b</sup> Cox proportional hazards regression adjusted for age, sex, household income, Townsend deprivation index, family history of CRC, screening history of CRC, non-steroidal anti-inflammatory drug use, relatedness, genotyping chip, and first 20 principal components of ancestry; P value for trend calculated considering each environmental risk category as continuous variables.

<sup>c</sup> The interaction between the polygenic risk score and the weighted environmental risk score.

**Table S7.** The CRC incidence risk in accordance with the combined genetic risk and environmental risk<sup>a</sup>.

| Genetic risk              | Environmental risk              | No. of participants | No. of CRC cases (%) / Person-years | HR (95% CI) <sup>b</sup> | P value | P value for trend |
|---------------------------|---------------------------------|---------------------|-------------------------------------|--------------------------|---------|-------------------|
| Low genetic risk          | Low environmental risk          | 25507               | 102 (0.40)/227013                   | 1 [reference]            |         |                   |
| Low genetic risk          | Intermediate environmental risk | 28490               | 118 (0.41)/253392                   | 0.95 (0.73-1.23)         | 0.687   |                   |
| Low genetic risk          | High environmental risk         | 13209               | 73 (0.55)/113188                    | 1.13 (0.84-1.53)         | 0.430   | < 0.001           |
| Intermediate genetic risk | Low environmental risk          | 76336               | 493 (0.65)/679657                   | 1.60 (1.29-1.98)         | < 0.001 |                   |
| Intermediate genetic risk | Intermediate environmental risk | 85018               | 746 (0.88)/757585                   | 1.94 (1.58-2.39)         | < 0.001 |                   |

|                           |                                 |       |                   |                  |         |
|---------------------------|---------------------------------|-------|-------------------|------------------|---------|
| Intermediate genetic risk | High environmental risk         | 40254 | 429 (1.07)/344747 | 2.22 (1.79-2.76) | < 0.001 |
| High genetic risk         | Low environmental risk          | 25392 | 278 (1.09)/219251 | 2.73 (2.17-3.42) | < 0.001 |
| High genetic risk         | Intermediate environmental risk | 28515 | 437 (1.53)/242750 | 3.35 (2.70-4.16) | < 0.001 |
| High genetic risk         | High environmental risk         | 13296 | 266 (2.00)/110122 | 4.18 (3.32-5.26) | < 0.001 |

<sup>a</sup> CRC, colorectal cancer; HR, hazard ratio; CI, confidence interval.

<sup>b</sup> Cox proportional hazards regression adjusted for age, sex, household income, Townsend deprivation index, family history of CRC, screening history of CRC, non-steroidal anti-inflammatory drug use, relatedness, genotyping chip, and first 20 principal components of ancestry; P value for trend calculated considering each environmental risk category as continuous variables.

**Table S8.** The CRC incidence risk in accordance with the combined genetic and environmental risk according to NSAIDs use after excluding related participants, events occurred within the first 2 years and individuals with missing covariate data<sup>a</sup>.

| Subgroup                        | Related participants excluded <sup>b</sup> (n=293517) |         | Outcomes within 2 years excluded <sup>c</sup> (n=335591) |         | Missing covariate data excluded <sup>c</sup> (n=293309) |         |
|---------------------------------|-------------------------------------------------------|---------|----------------------------------------------------------|---------|---------------------------------------------------------|---------|
|                                 | HR (95% CI)                                           | P value | HR (95% CI)                                              | P value | HR (95% CI)                                             | P value |
| Non-regular use of NSAIDs       |                                                       |         |                                                          |         |                                                         |         |
| Low genetic risk                |                                                       |         |                                                          |         |                                                         |         |
| Low environmental risk          | 1 [reference]                                         |         | 1 [reference]                                            |         | 1 [reference]                                           |         |
| Intermediate environmental risk | 0.90 (0.66-1.24)                                      | 0.530   | 0.90 (0.66-1.24)                                         | 0.532   | 1.01 (0.61-1.67)                                        | 0.979   |
| High environmental risk         | 1.17 (0.83-1.67)                                      | 0.368   | 1.18 (0.83-1.67)                                         | 0.366   | 0.86 (0.45-1.67)                                        | 0.666   |
| Intermediate genetic risk       |                                                       |         |                                                          |         |                                                         |         |
| Low environmental risk          | 1.63 (1.27-2.10)                                      | < 0.001 | 1.63 (1.27-2.10)                                         | < 0.001 | 1.67 (1.15-2.47)                                        | < 0.001 |
| Intermediate environmental risk | 2.15 (1.72-2.69)                                      | < 0.001 | 2.14 (1.72-2.69)                                         | < 0.001 | 2.21 (1.66-3.05)                                        | < 0.001 |
| High environmental risk         | 2.56 (2.05-3.12)                                      | < 0.001 | 2.53 (2.02-3.10)                                         | < 0.001 | 2.60 (1.81-3.84)                                        | < 0.001 |
| High genetic risk               |                                                       |         |                                                          |         |                                                         |         |
| Low environmental risk          | 2.85 (2.18-3.72)                                      | < 0.001 | 2.82 (2.16-3.69)                                         | < 0.001 | 2.89 (1.91-4.40)                                        | < 0.001 |
| Intermediate environmental risk | 3.41 (2.64-4.41)                                      | < 0.001 | 3.39 (2.63-4.39)                                         | < 0.001 | 3.42 (2.24-5.21)                                        | < 0.001 |
| High environmental risk         | 4.48 (3.42-5.85)                                      | < 0.001 | 4.46 (3.41-5.84)                                         | < 0.001 | 4.51 (3.24-6.61)                                        | < 0.001 |
| Regular use of NSAIDs           |                                                       |         |                                                          |         |                                                         |         |
| Low genetic risk                |                                                       |         |                                                          |         |                                                         |         |
| Low environmental risk          | 1 [reference]                                         |         | 1 [reference]                                            |         | 1 [reference]                                           |         |
| Intermediate environmental risk | 1.08 (0.66-1.78)                                      | 0.748   | 1.09 (0.66-1.78)                                         | 0.741   | 1.16 (0.69-1.94)                                        | 0.577   |
| High environmental risk         | 1.02 (0.54-1.92)                                      | 0.947   | 1.02 (0.55-1.92)                                         | 0.941   | 1.06 (0.54-2.07)                                        | 0.868   |
| Intermediate genetic risk       |                                                       |         |                                                          |         |                                                         |         |
| Low environmental risk          | 1.58 (1.05-2.38)                                      | 0.027   | 1.57 (1.05-2.36)                                         | 0.029   | 1.60 (1.04-2.48)                                        | 0.013   |
| Intermediate environmental risk | 2.05 (1.38-3.04)                                      | < 0.001 | 2.03 (1.37-3.02)                                         | < 0.001 | 2.09 (1.33-3.27)                                        | < 0.001 |
| High environmental risk         | 2.35 (1.54-3.58)                                      | < 0.001 | 2.31 (1.52-3.52)                                         | < 0.001 | 2.40 (1.47-3.90)                                        | < 0.001 |
| High genetic risk               |                                                       |         |                                                          |         |                                                         |         |
| Low environmental risk          | 2.50 (1.61-3.88)                                      | < 0.001 | 2.48 (1.59-3.86)                                         | < 0.001 | 2.55 (1.55-4.12)                                        | < 0.001 |
| Intermediate environmental risk | 3.35 (2.22-5.08)                                      | < 0.001 | 3.33 (2.20-5.04)                                         | < 0.001 | 3.41 (2.13-5.40)                                        | < 0.001 |
| High environmental risk         | 3.54 (2.23-5.62)                                      | < 0.001 | 3.55 (2.23-5.63)                                         | < 0.001 | 3.57 (2.18-6.14)                                        | < 0.001 |

<sup>a</sup> CRC, colorectal cancer; HR, hazard ratio; CI, confidence interval; NSAIDs, non-steroidal anti-inflammatory drugs.

<sup>b</sup> Adjusted for age, sex, household income, Townsend deprivation index, family history of CRC, screening history of CRC, genotyping chip, and first 20 principal components of ancestry.

<sup>c</sup> Adjusted for age, sex, household income, Townsend deprivation index, family history of CRC, screening history of CRC, relatedness, genotyping chip, and first 20 principal components of ancestry.

**Table S9.** The CRC incidence risk in accordance with the combined genetic and environmental risk according to NSAIDs use by sex and age<sup>a</sup>.

| Subgroup                        | Male <sup>b</sup> |         | Female <sup>b</sup> |         | Age < 60 years <sup>c</sup> |         | Age ≥ 60 years <sup>c</sup> |         |
|---------------------------------|-------------------|---------|---------------------|---------|-----------------------------|---------|-----------------------------|---------|
|                                 | HR (95% CI)       | P value | HR (95% CI)         | P value | HR (95% CI)                 | P value | HR (95% CI)                 | P value |
| Non-regular use of NSAIDs       |                   |         |                     |         |                             |         |                             |         |
| Low genetic risk                |                   |         |                     |         |                             |         |                             |         |
| Low environmental risk          | 1 [reference]     |         | 1 [reference]       |         | 1 [reference]               |         | 1 [reference]               |         |
| Intermediate environmental risk | 1.40 (0.88-2.22)  | 0.152   | 0.56 (0.35-1.21)    | 0.518   | 0.76 (0.45-1.28)            | 0.298   | 1.02 (0.69-1.51)            | 0.931   |
| High environmental risk         | 1.67 (1.02-2.72)  | 0.040   | 0.85 (0.49-1.47)    | 0.562   | 0.64 (0.31-1.32)            | 0.228   | 1.50 (0.99-2.26)            | 0.054   |
| Intermediate genetic risk       |                   |         |                     |         |                             |         |                             |         |
| Low environmental risk          | 1.99 (1.29-2.92)  | 0.002   | 1.40 (1.02-1.93)    | 0.037   | 1.87 (1.28-2.56)            | 0.010   | 1.61 (1.16-2.22)            | 0.004   |

|                                 |                          |                          |                           |                          |
|---------------------------------|--------------------------|--------------------------|---------------------------|--------------------------|
| Intermediate environmental risk | 2.61 (1.76-3.87) < 0.001 | 1.42 (1.01-1.96) 0.029   | 2.49 (1.92-3.34) 0.001    | 2.00 (1.46-2.73) < 0.001 |
| High environmental risk         | 3.29 (2.21-4.90) < 0.001 | 1.96 (1.57-2.51) 0.008   | 2.79 (2.09-3.84) < 0.001  | 2.33 (1.69-3.23) < 0.001 |
| High genetic risk               |                          |                          |                           |                          |
| Low environmental risk          | 3.51 (2.29-5.38) < 0.001 | 2.44 (1.77-3.39) < 0.001 | 2.96 (1.98-4.30) < 0.001  | 2.80 (2.01-3.99) < 0.001 |
| Intermediate environmental risk | 4.61 (3.08-6.90) < 0.001 | 3.15 (2.12-4.27) < 0.001 | 3.53 (2.37-5.26) < 0.001  | 3.26 (2.35-4.53) < 0.001 |
| High environmental risk         | 6.01 (3.98-9.08) < 0.001 | 3.36 (2.32-4.86) < 0.001 | 4.94 (3.25-7.52) < 0.001  | 4.17 (2.96-5.88) < 0.001 |
| P value for interaction         |                          | 0.428                    |                           | 0.112                    |
| Regular use of NSAIDs           |                          |                          |                           |                          |
| Low genetic risk                |                          |                          |                           |                          |
| Low environmental risk          | 1 [reference]            | 1 [reference]            | 1 [reference]             | 1 [reference]            |
| Intermediate environmental risk | 1.31 (0.66-2.62) 0.443   | 0.90 (0.43-1.91) 0.793   | 1.01 (0.38-2.69) 0.989    | 1.10 (0.62-1.96) 0.738   |
| High environmental risk         | 1.15 (0.50-2.66) 0.747   | 0.98 (0.36-2.69) 0.971   | 1.32 (0.40-4.41) 0.648    | 0.94 (0.45-1.96) 0.866   |
| Intermediate genetic risk       |                          |                          |                           |                          |
| Low environmental risk          | 1.97 (1.07-3.62) 0.030   | 1.29 (0.74-2.23) 0.365   | 1.78 (0.84-3.78) 0.135    | 1.51 (0.93-2.45) 0.094   |
| Intermediate environmental risk | 2.35 (1.30-4.25) 0.005   | 1.58 (0.84-2.99) 0.159   | 2.38 (1.14-5.00) 0.022    | 1.93 (1.21-3.08) 0.006   |
| High environmental risk         | 3.02 (1.64-5.55) < 0.001 | 1.88 (1.09-3.22) 0.022   | 2.66 (1.18-5.97) 0.018    | 2.23 (1.36-3.65) 0.001   |
| High genetic risk               |                          |                          |                           |                          |
| Low environmental risk          | 2.80 (1.44-5.43) 0.002   | 2.39 (1.33-4.28) 0.003   | 2.76 (1.23-6.21) 0.014    | 2.53 (1.50-4.26) < 0.001 |
| Intermediate environmental risk | 3.90 (2.12-7.20) < 0.001 | 3.12 (1.76-5.54) < 0.001 | 3.44 (1.74-7.33) < 0.001  | 2.80 (1.71-4.61) < 0.001 |
| High environmental risk         | 5.23 (2.76-9.91) < 0.001 | 3.29 (1.85-6.45) < 0.001 | 4.81 (2.01-11.52) < 0.001 | 3.35 (1.95-5.75) < 0.001 |
| P value for interaction         |                          | 0.625                    |                           | 0.025                    |

<sup>a</sup> CRC, colorectal cancer; HR, hazard ratio; CI, confidence interval; NSAIDs, non-steroidal anti-inflammatory drugs.

<sup>b</sup> Adjusted for age, household income, Townsend deprivation index, family history of CRC, screening history of CRC, relatedness, genotyping chip, and first 20 principal components of ancestry.

<sup>c</sup> Adjusted for sex, household income, Townsend deprivation index, family history of CRC, screening history of CRC, relatedness, genotyping chip, and first 20 principal components of ancestry.

**Table S10.** The CRC incidence risk in accordance with the combined genetic and environmental risk according to NSAIDs use by screening history of CRC<sup>a</sup>.

| Subgroup                        | Screening history <sup>b</sup> |         | No screening history <sup>b</sup> |         |
|---------------------------------|--------------------------------|---------|-----------------------------------|---------|
|                                 | HR (95% CI)                    | P value | HR (95% CI)                       | P value |
| Non-regular use of NSAIDs       |                                |         |                                   |         |
| Low genetic risk                |                                |         |                                   |         |
| Low environmental risk          | 1 [reference]                  |         | 1 [reference]                     |         |
| Intermediate environmental risk | 1.22 (0.69-2.16)               | 0.495   | 0.77 (0.53-1.13)                  | 0.185   |
| High environmental risk         | 1.34 (0.71-2.54)               | 0.363   | 1.10 (0.73-1.66)                  | 0.640   |
| Intermediate genetic risk       |                                |         |                                   |         |
| Low environmental risk          | 1.60 (0.98-2.63)               | 0.061   | 1.60 (1.19-2.13)                  | 0.002   |
| Intermediate environmental risk | 2.00 (1.21-3.31)               | 0.003   | 2.15 (1.60-2.66)                  | < 0.001 |
| High environmental risk         | 2.04 (1.27-3.29)               | 0.007   | 2.75 (2.18-3.52)                  | < 0.001 |
| High genetic risk               |                                |         |                                   |         |
| Low environmental risk          | 2.22 (1.93-5.38)               | < 0.001 | 2.91 (2.21-3.87)                  | < 0.001 |
| Intermediate environmental risk | 3.19 (1.87-5.36)               | < 0.001 | 3.49 (2.65-4.62)                  | < 0.001 |
| High environmental risk         | 4.05 (2.40-6.86)               | < 0.001 | 4.44 (3.27-6.05)                  | < 0.001 |
| P value for interaction         |                                | 0.499   |                                   |         |
| Regular use of NSAIDs           |                                |         |                                   |         |
| Low genetic risk                |                                |         |                                   |         |
| Low environmental risk          | 1 [reference]                  |         | 1 [reference]                     |         |
| Intermediate environmental risk | 0.96 (0.41-2.23)               | 0.925   | 1.14 (0.62-2.10)                  | 0.674   |
| High environmental risk         | 0.73 (0.23-2.35)               | 0.602   | 1.17 (0.55-2.49)                  | 0.681   |
| Intermediate genetic risk       |                                |         |                                   |         |
| Low environmental risk          | 1.36 (0.68-2.71)               | 0.389   | 1.51 (1.02-2.64)                  | 0.046   |
| Intermediate environmental risk | 1.48 (0.76-2.91)               | 0.253   | 2.05 (1.24-3.54)                  | 0.001   |
| High environmental risk         | 1.38 (0.64-2.94)               | 0.409   | 2.15 (1.11-4.06)                  | < 0.001 |
| High genetic risk               |                                |         |                                   |         |
| Low environmental risk          | 2.21 (1.05-4.68)               | 0.038   | 2.58 (1.42-4.56)                  | < 0.001 |
| Intermediate environmental risk | 2.41 (1.04-5.62)               | 0.041   | 3.44 (2.06-6.27)                  | < 0.001 |
| High environmental risk         | 2.46 (1.21-5.03)               | 0.013   | 4.29 (2.46-7.47)                  | < 0.001 |
| P value for interaction         |                                | 0.376   |                                   |         |

<sup>a</sup> CRC, colorectal cancer; HR, hazard ratio; CI, confidence interval; NSAIDs, non-steroidal anti-inflammatory drugs.

<sup>b</sup> Adjusted for age, household income, Townsend deprivation index, family history of CRC, relatedness, genotyping chip, and first 20 principal components of ancestry.

## References

1. Chadeau-Hyam M, Bodinier B, Vermeulen R, Karimi M, Zuber V, Castagné R, Elliott J, Muller D, Petrovic D, Whitaker M, et al. Education, biological ageing, all-cause and cause-specific mortality and morbidity: UK biobank cohort study. *EClinicalMedicine* 2020;29-30:100658. doi: 10.1016/j.eclinm.2020.100658.
2. Fung TT, Chiuve SE, McCullogh ML, Rexrode KM, Logroscino G, Hu FB. Adherence to a DASH-style diet and risk of coronary heart disease and stroke in women. *Arch Intern Med* 2008;168:713-20. doi: 10.1001/archinte.168.7.713.
3. Fung TT, Hu FB, Wu K, Chiuve SE, Fuchs CS, Giovannucci E. The Mediterranean and Dietary Approaches to Stop Hypertension (DASH) diets and colorectal cancer. *Am J Clin Nutr* 2010;92:1429-35. doi: 10.3945/ajcn.2010.29242.
4. Tsoi KK, Pau CY, Wu WK, Chan FK, Griffiths S, Sung JJ. Cigarette smoking and the risk of colorectal cancer: a meta-analysis of prospective cohort studies. *Clin Gastroenterol Hepatol* 2009;7(6):682-8.e1-5. doi: 10.1016/j.cgh.2009.02.016.
5. Walter V, Jansen L, Hoffmeister M, Ulrich A, Chang-Claude J, Brenner H. Smoking and survival of colorectal cancer patients: population-based study from Germany. *Int J Cancer* 2015;137(6):1433-45. doi: 10.1002/ijc.29511.
6. DeSalvo, K.B.; Olson, R.; Casavale, K.O. Dietary Guidelines for Americans. *JAMA* 2016;315: 457-458. doi: 10.1001/jama.2015.18396.
7. World Health Organization. Global Recommendations on Physical Activity for Health. Geneva, 2010.
